# Supplementary material for: Molecular Signatures of Human Regulatory T Cells in Colorectal Cancer and Polyps
Source: Front Immunol. 2017 May 30;8:620. doi: 10.3389/fimmu.2017.00620 (PMC5447675; doi:10.3389/fimmu.2017.00620)
Supplement: Supplementary file 3 [file Data_Sheet_3.XLSX]

## Sheet: Summary CRC vs N  10052016 fold
Transcript Cluster ID	CRC Bi-weight Avg Signal (log2)	N Bi-weight Avg Signal (log2)	Fold Change (linear) (CRC vs. N)	ANOVA p-value (CRC vs. N)	FDR p-value (CRC vs. N)	Gene Symbol	Description	GO Biological Process Term
16952874	4.18	1.82	5.16	5e-06	0.000242	CCR1	chemokine (C-C motif) receptor 1	dendritic cell chemotaxis; calcium ion transport; cellular calcium ion homeostasis; exocytosis; chemotaxis; inflammatory response; immune response; cell adhesion; cell surface receptor signaling pathway; G-protein coupled receptor signaling pathway, coupled to cyclic nucleotide second messenger; positive regulation of cytosolic calcium ion concentration; cell-cell signaling; metabolic process; re…
16938707	6.41	4.29	4.36	0.00038	0.006389	CCR4	chemokine (C-C motif) receptor 4	neuron migration; tolerance induction; chemotaxis; inflammatory response; immune response; G-protein coupled receptor signaling pathway; positive regulation of cytosolic calcium ion concentration; response to radiation; response to bacterium; response to antibiotic; positive regulation of positive chemotaxis; chemokine-mediated signaling pathway; signal transduction
16977052	3.65	1.54	4.32	0.000292	0.00521	CXCL10	chemokine (C-X-C motif) ligand 10	positive regulation of leukocyte chemotaxis; chemotaxis; inflammatory response; immune response; signal transduction; cell surface receptor signaling pathway; G-protein coupled receptor signaling pathway; cell-cell signaling; muscle organ development; blood circulation; positive regulation of cell proliferation; protein secretion; response to cold; response to gamma radiation; T cell chemotaxis; …
16940172	5.22	3.15	4.21	0.000135	0.002884	CCR2	chemokine (C-C motif) receptor 2
16767247	6.37	4.36	4.05	1.7e-05	0.000591	IFNG	interferon, gamma
16802519	6.47	4.46	4.02	6.99e-09	2e-06	KIF23	kinesin family member 23	mitotic spindle elongation; mitotic cell cycle; cytokinesis; microtubule-based movement; blood coagulation; metabolic process; antigen processing and presentation of exogenous peptide antigen via MHC class II; positive regulation of cytokinesis; spindle midzone assembly involved in mitosis; cell cycle; mitotic nuclear division; cell division				A
16834056	4.34	2.37	3.91	1.13e-09	6.42e-07	CDC6	cell division cycle 6; cell division cycle 6 homolog (S. cerevisiae)	DNA replication checkpoint; regulation of cyclin-dependent protein serine/threonine kinase activity; G1/S transition of mitotic cell cycle; regulation of transcription involved in G1/S transition of mitotic cell cycle; mitotic cell cycle; DNA replication; mitotic nuclear division; traversing start control point of mitotic cell cycle; negative regulation of DNA replication; negative regulation of …
16707551	6.53	4.56	3.9	3.7e-08	7e-06	CEP55	centrosomal protein 55kDa	mitotic cytokinesis; mitotic nuclear division; establishment of protein localization; cell cycle; cell division
16989636	5.16	3.23	3.81	3.59e-08	7e-06	KIF20A	kinesin family member 20A	mitotic cell cycle; cytokinesis; microtubule bundle formation; microtubule-based movement; metabolic process; protein transport; vesicle-mediated transport; transport
16819207	5.75	3.83	3.77	2e-06	0.000111	MT2A	metallothionein 2A	cellular copper ion homeostasis; cytokine-mediated signaling pathway; cellular response to drug; cellular response to interleukin-3; cellular response to erythropoietin; negative regulation of growth; interferon-gamma-mediated signaling pathway; cellular response to zinc ion
16736638	6	4.13	3.67	1.95e-09	9.02e-07	E2F8	E2F transcription factor 8	negative regulation of transcription from RNA polymerase II promoter; placenta development; sprouting angiogenesis; transcription, DNA-templated; cell proliferation; negative regulation of cytokinesis; positive regulation of DNA endoreduplication; cell cycle comprising mitosis without cytokinesis; positive regulation of transcription from RNA polymerase II promoter; trophoblast giant cell differe…
16696237	5.81	3.96	3.62	0.000179	0.003575	SELL	selectin L	cell adhesion; blood coagulation; response to ATP; regulation of immune response; leukocyte migration
17075973	6	4.23	3.43	2.37e-07	2.6e-05	DUSP4	dual specificity phosphatase 4	MAPK cascade; inactivation of MAPK activity; endoderm formation; toll-like receptor signaling pathway; MyD88-dependent toll-like receptor signaling pathway; MyD88-independent toll-like receptor signaling pathway; protein dephosphorylation; toll-like receptor 2 signaling pathway; toll-like receptor 3 signaling pathway; toll-like receptor 4 signaling pathway; toll-like receptor 5 signaling pathway;…
16859763	6.03	4.27	3.39	4e-06	0.000188	IFI30; PIK3R2; AC007192.4	interferon, gamma-inducible protein 30; phosphoinositide-3-kinase, regulatory subunit 2 (beta); novel protein, readthrough between PIK3R2 and IFI30	cytokine-mediated signaling pathway; antigen processing and presentation of exogenous peptide antigen via MHC class II; antigen processing and presentation of exogenous peptide antigen via MHC class I; negative regulation of fibroblast proliferation; protein stabilization; oxidation-reduction process; interferon-gamma-mediated signaling pathway; immune system process; phospholipid metabolic proce…
16698684	3.09	1.34	3.38	3e-06	0.000175	IL10	interleukin 10
17111955	5.32	3.73	3.01	5e-06	0.000245	CXCR3	chemokine (C-X-C motif) receptor 3	angiogenesis; negative regulation of endothelial cell proliferation; regulation of leukocyte migration; apoptotic process; cellular component movement; chemotaxis; inflammatory response; cell adhesion; cell surface receptor signaling pathway; G-protein coupled receptor signaling pathway; positive regulation of cytosolic calcium ion concentration; positive regulation of cell proliferation; T cell …
16689332	4.42	2.89	2.9	2.4e-05	0.000764	GBP1	guanylate binding protein 1, interferon-inducible	GTP catabolic process; cytokine-mediated signaling pathway; defense response to virus; interferon-gamma-mediated signaling pathway; immune system process
16837270	8.27	6.85	2.68	2.4e-08	5e-06	KPNA2	karyopherin alpha 2 (RAG cohort 1, importin alpha 1)	regulation of DNA recombination; mitotic G2 phase; DNA metabolic process; NLS-bearing protein import into nucleus; viral process; cytokine-mediated signaling pathway; protein import into nucleus; transport; protein transport; modulation by virus of host morphology or physiology; M phase specific microtubule process
16849400	6.52	5.11	2.66	0.000272	0.004919	SOCS3	suppressor of cytokine signaling 3	negative regulation of protein kinase activity; JAK-STAT cascade; protein ubiquitination; cytokine-mediated signaling pathway; regulation of growth; negative regulation of apoptotic process; positive regulation of cell differentiation; negative regulation of insulin receptor signaling pathway; interferon-gamma-mediated signaling pathway; regulation of interferon-gamma-mediated signaling pathway; …
16751709	4.37	3.02	2.55	8.25e-08	1.2e-05	ESPL1	extra spindle pole bodies homolog 1 (S. cerevisiae)	mitotic sister chromatid segregation; meiotic spindle organization; mitotic cell cycle; cytokinesis; proteolysis; apoptotic process; establishment of mitotic spindle localization; homologous chromosome segregation; positive regulation of mitotic metaphase/anaphase transition; negative regulation of sister chromatid cohesion; chromosome segregation; meiosis I
17001654	5.63	4.3	2.53	3e-06	0.000143	CD74	CD74 molecule, major histocompatibility complex, class II invariant chain
17005603	2.93	1.62	2.49	4.8e-05	0.001312	HIST1H2BI	histone cluster 1, H2bi	innate immune response in mucosa; chromatin organization; nucleosome assembly; antibacterial humoral response; defense response to bacterium; defense response to Gram-positive bacterium
16725806	5.33	4.05	2.43	6.06e-08	1e-05	INCENP	inner centromere protein antigens 135/155kDa	mitotic cell cycle; cytokinesis; chromosome segregation; mitotic nuclear division; cell cycle; cell division
17040387	8.79	7.51	2.42	1.4e-05	0.000506	HLA-A	major histocompatibility complex, class I, A	positive regulation of T cell mediated cytotoxicity; antigen processing and presentation of peptide antigen via MHC class I; antigen processing and presentation of exogenous peptide antigen via MHC class I, TAP-dependent; antigen processing and presentation of exogenous peptide antigen via MHC class I, TAP-independent; antigen processing and presentation of endogenous peptide antigen via MHC clas…
16866574	5.75	4.54	2.32	1.01e-07	1.4e-05	SBNO2	strawberry notch homolog 2 (Drosophila)	macrophage activation involved in immune response; transcription, DNA-templated; negative regulation of transcription, DNA-templated; regulation of inflammatory response; regulation of transcription, DNA-templated
17016457	7.29	6.16	2.18	1.4e-05	0.000505	HIST1H2BK	histone cluster 1, H2bk	innate immune response in mucosa; chromatin organization; nucleosome assembly; antibacterial humoral response; defense response to Gram-positive bacterium; defense response to bacterium
17004167	6.06	4.94	2.16	4.21e-07	3.8e-05	IRF4	interferon regulatory factor 4	transcription, DNA-templated; peptidyl-lysine methylation; cytokine-mediated signaling pathway; negative regulation of toll-like receptor signaling pathway; T cell activation; defense response to protozoan; myeloid dendritic cell differentiation; positive regulation of DNA binding; histone H3 acetylation; histone H4 acetylation; positive regulation of interleukin-10 biosynthetic process; positive…
16910536	4.77	3.66	2.15	8e-06	0.000331	PDCD1	programmed cell death 1	apoptotic process; humoral immune response; signal transduction; multicellular organismal development; T cell costimulation; immune system process
16711501	10.43	9.33	2.14	0.000524	0.008212	IL2RA	interleukin 2 receptor, alpha	inflammatory response to antigenic stimulus; apoptotic process; activation-induced cell death of T cells; immune response; cell surface receptor signaling pathway; Notch signaling pathway; cell proliferation; interleukin-2-mediated signaling pathway; positive regulation of activated T cell proliferation; negative regulation of T cell proliferation; positive regulation of T cell differentiation; r…
16803114	4.05	2.97	2.12	9e-05	0.002112	SCAMP5	secretory carrier membrane protein 5	exocytosis; protein transport; response to endoplasmic reticulum stress; negative regulation of endocytosis; positive regulation of calcium ion-dependent exocytosis; positive regulation of cytokine secretion; transport
16813342	5.68	4.6	2.11	5.32e-07	4.5e-05	PRC1	protein regulator of cytokinesis 1	mitotic spindle elongation; cytokinesis; microtubule cytoskeleton organization; cell cycle; cell division
16786616	5.3	4.26	2.06	3.06e-07	3e-05	BATF	basic leucine zipper transcription factor, ATF-like	cytokine production; lymphoid progenitor cell differentiation; transcription, DNA-templated; regulation of transcription, DNA-templated; cellular response to DNA damage stimulus; DNA damage response, signal transduction by p53 class mediator; defense response to protozoan; myeloid dendritic cell differentiation; T-helper 2 cell differentiation; isotype switching; hematopoietic stem cell different…
16756334	4.28	3.25	2.03	1.1e-05	0.000419	POLR3B	polymerase (RNA) III (DNA directed) polypeptide B	transcription from RNA polymerase III promoter; transcription elongation from RNA polymerase III promoter; termination of RNA polymerase III transcription; gene expression; positive regulation of type I interferon production; positive regulation of interferon-beta production; innate immune response; positive regulation of innate immune response; defense response to virus; immune system process; t…
16967853	1.56	2.64	-2.12	0.000268	0.004851	AREG	amphiregulin	epidermal growth factor receptor signaling pathway; G-protein coupled receptor signaling pathway; cell-cell signaling; cell proliferation; positive regulation of DNA replication
16782098	6.16	7.25	-2.14	0.000599	0.009073	TRAJ12; YME1L1	T cell receptor alpha joining 12; YME1-like 1 ATPase	misfolded or incompletely synthesized protein catabolic process; mitochondrion organization; cell proliferation; T cell costimulation; regulation of immune response; T cell receptor signaling pathway; immune response; proteolysis
16782066	5.99	7.1	-2.15	0.000201	0.003875	TRAJ29; YME1L1; TRDV2	T cell receptor alpha joining 29; YME1-like 1 ATPase; T cell receptor delta variable 2	misfolded or incompletely synthesized protein catabolic process; mitochondrion organization; cell proliferation; T cell costimulation; regulation of immune response; T cell receptor signaling pathway; immune response; proteolysis
16840318	2.58	3.78	-2.3	2e-06	0.000127	LOC728392; NLRP1	uncharacterized LOC728392; NLR family, pyrin domain containing 1	apoptotic process; activation of cysteine-type endopeptidase activity involved in apoptotic process; response to muramyl dipeptide; nucleotide-binding domain, leucine rich repeat containing receptor signaling pathway; defense response to bacterium; innate immune response; positive regulation of interleukin-1 beta secretion; regulation of inflammatory response; neuron apoptotic process; defense re…
17056817	0.93	2.12	-2.3	0.000376	0.006336	TARP; TRGC1	TCR gamma alternate reading frame protein; T cell receptor gamma constant 1	immune response; signal transduction
16782068	7.42	8.63	-2.32	0.000511	0.008039	TRAJ28; YME1L1	T cell receptor alpha joining 28; YME1-like 1 ATPase	misfolded or incompletely synthesized protein catabolic process; mitochondrion organization; cell proliferation; T cell costimulation; regulation of immune response; T cell receptor signaling pathway; immune response; proteolysis
16782102	7.67	8.93	-2.4	4e-06	0.000189	TRAJ10; YME1L1; TRDV2	T cell receptor alpha joining 10; YME1-like 1 ATPase; T cell receptor delta variable 2	misfolded or incompletely synthesized protein catabolic process; mitochondrion organization; cell proliferation; T cell costimulation; regulation of immune response; T cell receptor signaling pathway; immune response; proteolysis
17117617	5.85	7.13	-2.42	1.46e-08	3e-06	PCID2	PCI domain containing 2	negative regulation of apoptotic process; regulation of mRNA stability; positive regulation of B cell differentiation; positive regulation of transcription, DNA-templated; spleen development; positive regulation of mitotic cell cycle spindle assembly checkpoint; negative regulation of cysteine-type endopeptidase activity
17052683	8.08	9.39	-2.47	0.000331	0.00574	TRBJ2-7; IL23A	T cell receptor beta joining 2-7; interleukin 23, alpha subunit p19	positive regulation of T cell mediated cytotoxicity; positive regulation of defense response to virus by host; positive regulation of T-helper 1 type immune response; inflammatory response; positive regulation of activation of JAK2 kinase activity; negative regulation of interleukin-10 production; positive regulation of granulocyte macrophage colony-stimulating factor production; positive regulat…
17119662	8.08	9.39	-2.47	0.000331	0.00574	TRBJ2-7; IL23A	T cell receptor beta joining 2-7; interleukin 23, alpha subunit p19	positive regulation of T cell mediated cytotoxicity; positive regulation of defense response to virus by host; positive regulation of T-helper 1 type immune response; inflammatory response; positive regulation of activation of JAK2 kinase activity; negative regulation of interleukin-10 production; positive regulation of granulocyte macrophage colony-stimulating factor production; positive regulat…
16782046	6.3	7.66	-2.57	2.8e-05	0.000857	TRAJ39; YME1L1	T cell receptor alpha joining 39; YME1-like 1 ATPase	misfolded or incompletely synthesized protein catabolic process; mitochondrion organization; cell proliferation; T cell costimulation; regulation of immune response; T cell receptor signaling pathway; immune response; proteolysis
16782082	7.74	9.13	-2.62	0.000273	0.004921	TRAJ21; YME1L1	T cell receptor alpha joining 21; YME1-like 1 ATPase	misfolded or incompletely synthesized protein catabolic process; mitochondrion organization; cell proliferation; T cell costimulation; regulation of immune response; T cell receptor signaling pathway; immune response; proteolysis
16780917	3.36	4.78	-2.67	6.65e-10	4.78e-07	IRS2	insulin receptor substrate 2	positive regulation of mesenchymal cell proliferation; negative regulation of B cell apoptotic process; glucose metabolic process; signal transduction; epidermal growth factor receptor signaling pathway; brain development; cell proliferation; positive regulation of cell proliferation; insulin receptor signaling pathway; fibroblast growth factor receptor signaling pathway; response to glucose; neg…
16782106	8.26	9.73	-2.77	2.32e-08	5e-06	YME1L1; TRAV12-2	YME1-like 1 ATPase; T cell receptor alpha variable 12-2	misfolded or incompletely synthesized protein catabolic process; mitochondrion organization; cell proliferation; T cell costimulation; regulation of immune response; T cell receptor signaling pathway; immune response; proteolysis
16782104	6.25	7.76	-2.84	9.76e-08	1.4e-05	TRAJ9	T cell receptor alpha joining 9
16782070	7.13	8.66	-2.89	2e-06	0.000114	TRAJ27; YME1L1	T cell receptor alpha joining 27; YME1-like 1 ATPase	misfolded or incompletely synthesized protein catabolic process; mitochondrion organization; cell proliferation; T cell costimulation; regulation of immune response; T cell receptor signaling pathway; immune response; proteolysis
16782100	6.09	7.62	-2.9	0.000231	0.004342	TRAJ11	T cell receptor alpha joining 11
16782096	4.72	6.27	-2.93	6e-06	0.000273	YME1L1	YME1-like 1 ATPase	misfolded or incompletely synthesized protein catabolic process; mitochondrion organization; cell proliferation; T cell costimulation; regulation of immune response; T cell receptor signaling pathway; immune response; proteolysis
16782032	4.2	5.81	-3.05	0.000421	0.006937	TRAJ46	T cell receptor alpha joining 46
16782090	5.48	7.1	-3.08	2.3e-05	0.000753	TRAJ17	T cell receptor alpha joining 17	T cell costimulation; regulation of immune response; T cell receptor signaling pathway; immune response
16782110	5.19	6.85	-3.15	1.9e-05	0.000651	TRAJ6; YME1L1	T cell receptor alpha joining 6; YME1-like 1 ATPase	misfolded or incompletely synthesized protein catabolic process; mitochondrion organization; cell proliferation; T cell costimulation; regulation of immune response; T cell receptor signaling pathway; immune response; proteolysis
16782086	4.81	6.6	-3.47	1.4e-05	0.000499	TRAJ19	T cell receptor alpha joining 19 (non-functional)
16782114	6.66	8.46	-3.49	1.01e-08	3e-06	TRAJ4; YME1L1	T cell receptor alpha joining 4; YME1-like 1 ATPase	misfolded or incompletely synthesized protein catabolic process; mitochondrion organization; cell proliferation; T cell costimulation; regulation of immune response; T cell receptor signaling pathway; immune response; proteolysis
16782084	6.19	8.01	-3.51	2.2e-07	2.4e-05	TRAJ20; YME1L1; TRAV12-2	T cell receptor alpha joining 20; YME1-like 1 ATPase; T cell receptor alpha variable 12-2	misfolded or incompletely synthesized protein catabolic process; mitochondrion organization; cell proliferation; T cell costimulation; regulation of immune response; T cell receptor signaling pathway; immune response; proteolysis
16967863	1.73	3.54	-3.51	0.000135	0.002884	AREG	amphiregulin	epidermal growth factor receptor signaling pathway; G-protein coupled receptor signaling pathway; cell-cell signaling; cell proliferation; positive regulation of DNA replication
16782076	6.38	8.21	-3.56	2.6e-07	2.7e-05	YME1L1	YME1-like 1 ATPase	misfolded or incompletely synthesized protein catabolic process; mitochondrion organization; cell proliferation; T cell costimulation; regulation of immune response; T cell receptor signaling pathway; immune response; proteolysis
16782116	4.67	6.54	-3.66	6.08e-07	5e-05	TRAJ3; YME1L1; TRAC	T cell receptor alpha joining 3; YME1-like 1 ATPase; T cell receptor alpha constant	misfolded or incompletely synthesized protein catabolic process; mitochondrion organization; cell proliferation; T cell costimulation; regulation of immune response; T cell receptor signaling pathway; immune response; proteolysis
16782120	3.81	5.69	-3.69	1.32e-08	3e-06	TRAJ1	T cell receptor alpha joining 1 (non-functional)
16669796	7.46	9.85	-5.22	4.36e-09	2e-06	TXNIP	thioredoxin interacting protein	negative regulation of transcription from RNA polymerase II promoter; transcription, DNA-templated; protein import into nucleus; cell cycle; response to mechanical stimulus; response to glucose; keratinocyte differentiation; response to estradiol; response to progesterone; nucleotide-binding domain, leucine rich repeat containing receptor signaling pathway; regulation of cell proliferation; respo…
16781923	2.26	5.35	-8.51	1.3e-05	0.000475	TRAV22	T cell receptor alpha variable 22
17056815	2.53	6.08	-11.71	1.08e-08	3e-06	TRGJP2; TARP; TRGC2	T cell receptor gamma joining P2; TCR gamma alternate reading frame protein; T cell receptor gamma constant 2	immune response; signal transduction
Data Sheets S3: Immune-related genes as the most significant DEG function group in CRC- derived Tregs compared with N-derived Tregs.
